# Supplementary material
Source: PubMed Central journal article supplement (PMC5198289)
Supplement: ASN.2016030278SupplementaryData.pdf [file ASN.2016030278SupplementaryData.pdf]

**Supplemental Table 1.** Effect of canagliflozin versus glimepiride on albuminuria and annual eGFR decline according to baseline use of angiotensin-converting enzyme inhibitors or angiotensin receptor blockers

| <b>Albuminuria (%)</b>                                 |                        |                      |
|--------------------------------------------------------|------------------------|----------------------|
|                                                        | <b>Change (95% CI)</b> | <b>P-interaction</b> |
| <i>Canagliflozin 100 mg vs glimepiride</i>             |                        |                      |
| ACEi/ARB                                               | -9.7 (-19.9 to 1.7)    | 0.227                |
| No ACEi/ARB                                            | -1.9 (-12.3 to 9.8)    |                      |
| <i>Canagliflozin 300 mg vs glimepiride</i>             |                        |                      |
| ACEi/ARB                                               | -8.7 (-19.1 to 3.0)    | 0.112                |
| No ACEi/ARB                                            | -13.5 (-22.7 to -3.2)  |                      |
| <b>Annual eGFR decline (mL/min/1.73 m<sup>2</sup>)</b> |                        |                      |
| <i>Canagliflozin 100 mg vs glimepiride</i>             |                        |                      |
| ACEi/ARB                                               | 3.2 (2.2 to 4.1)       | 0.246                |
| No ACEi/ARB                                            | 2.3 (1.2 to 3.5)       |                      |
| <i>Canagliflozin 300 mg vs glimepiride</i>             |                        |                      |
| ACEi/ARB                                               | 2.1 (1.2 to 3.1)       | 0.542                |
| No ACEi/ARB                                            | 2.7 (1.5 to 3.8)       |                      |

eGFR, estimated glomerular filtration rate; CI, confidence interval; ACEi, angiotensin-converting enzyme inhibitor; ARB, angiotensin receptor blocker.
